# Supplementary material
Source: MDPI journal article supplement (https://www.mdpi.com/2571-8789/5/3/46)
Supplement: s1 [file s1]

Article

# Spatial Analysis of Soil Trace Element Contaminants in Urban Public Open Space, Perth, Western Australia

Andrew W. Rate

School of Agriculture and Environment, The University of Western Australia, Perth, WA 6009, Australia; andrew.rate@uwa.edu.au

**Citation:** Rate, A.W. Spatial Analysis of Soil Trace Element Contaminants in Urban Public Open Space, Perth, Western Australia. *Soil Syst.* **2021**, *5*, 46. <https://doi.org/10.3390/soilsystems5030046>

Academic Editors: Matteo Spagnuolo, Paola Adamo and Giovanni Garau

Received: 29 June 2021

Accepted: 12 August 2021

Published: 14 August 2021

**Publisher's Note:** MDPI stays neutral with regard to jurisdictional claims in published maps and institutional affiliations.

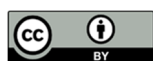

**Copyright:** © 2021 by the authors. Licensee MDPI, Basel, Switzerland. This article is an open access article distributed under the terms and conditions of the Creative Commons Attribution (CC BY) license (<http://creativecommons.org/licenses/by/4.0/>).

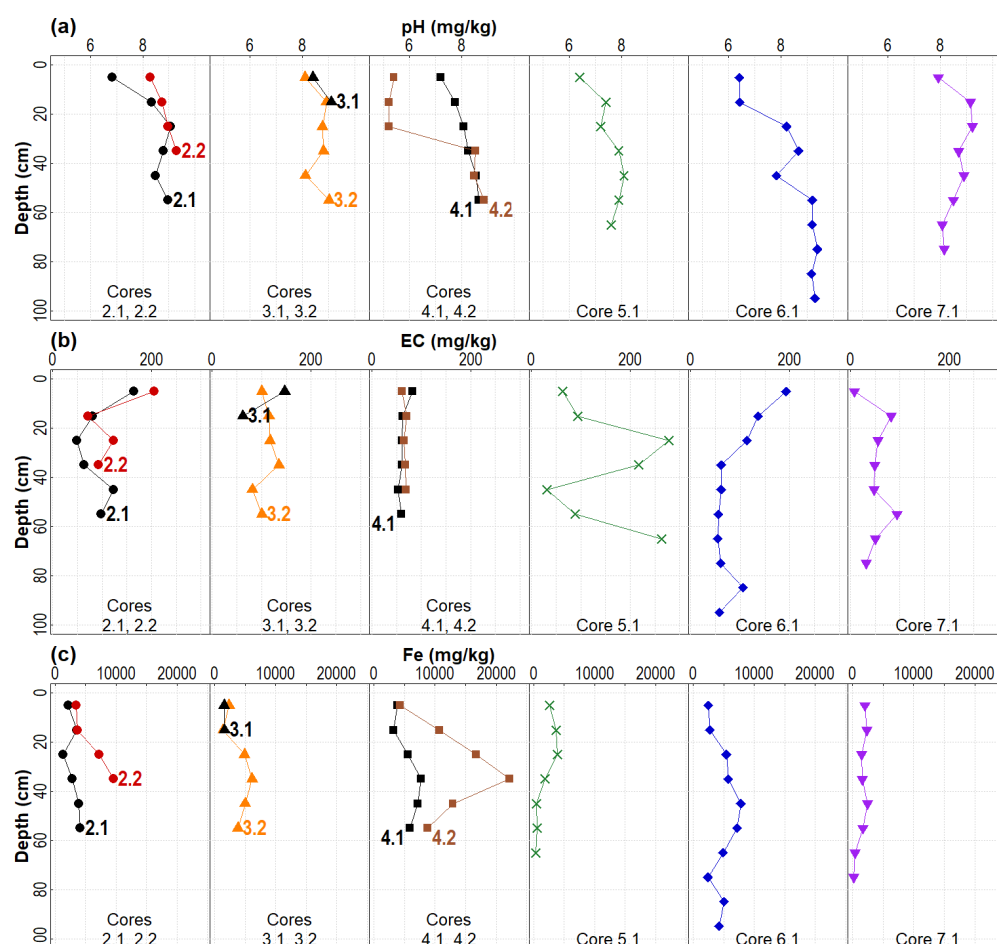

**Figure S1.** Depth profiles of (a) pH, (b) EC, and (c) Fe in soil cores collected from Smith's Lake and Charles Veryard Reserves, City of Vincent, Western Australia.

**Table S1.** Matrix of **Spearman correlation coefficients** for pH, EC, and elemental composition of soil samples from Smith's Lake and Charles Veryard Reserves. Values in **bold type** indicate a significant correlation ( $p \leq 0.05$ , using Holm's adjusted p-values for multiple comparisons).

|           | pH          | EC    | Al          | As          | Ba          | Ca          | Cd          | Ce          | Cr          | Cu          | Fe          | Gd          | K    | La          | Mg          | Mn          | Mo          | Na          | Nd          | Ni          | P           | Pb          | S           | Sr          | Th          | V           | Y           | Zn          |           |
|-----------|-------------|-------|-------------|-------------|-------------|-------------|-------------|-------------|-------------|-------------|-------------|-------------|------|-------------|-------------|-------------|-------------|-------------|-------------|-------------|-------------|-------------|-------------|-------------|-------------|-------------|-------------|-------------|-----------|
| <b>pH</b> |             | 0.12  | 0.26        | 0.37        | 0.29        | <b>0.66</b> | 0.30        | 0.02        | 0.34        | 0.38        | 0.36        | -0.21       | 0.09 | 0.16        | 0.39        | 0.12        | 0.23        | 0.20        | -0.42       | 0.09        | 0.21        | 0.29        | 0.08        | <b>0.66</b> | <b>0.63</b> | 0.34        | -0.13       | 0.07        | <b>pH</b> |
| <b>EC</b> | 0.12        |       | 0.04        | -0.05       | 0.09        | 0.31        | -0.11       | 0.04        | -0.09       | -0.04       | -0.02       | -0.05       | 0.38 | 0.11        | 0.26        | 0.15        | -0.09       | 0.39        | -0.04       | -0.34       | 0.23        | -0.11       | 0.20        | 0.25        | 0.16        | -0.05       | 0.08        | -0.10       | <b>EC</b> |
| <b>Al</b> | 0.26        | 0.04  |             | <b>0.56</b> | 0.21        | 0.27        | 0.14        | <b>0.68</b> | <b>0.69</b> | 0.38        | <b>0.60</b> | <b>0.44</b> | 0.37 | <b>0.62</b> | 0.26        | 0.31        | <b>0.50</b> | 0.19        | 0.30        | 0.19        | 0.38        | 0.16        | 0.08        | 0.29        | 0.31        | <b>0.75</b> | 0.39        | 0.13        | <b>Al</b> |
| <b>As</b> | 0.37        | -0.05 | <b>0.56</b> |             | <b>0.56</b> | 0.41        | <b>0.55</b> | 0.46        | <b>0.65</b> | <b>0.62</b> | <b>0.85</b> | 0.19        | 0.25 | <b>0.53</b> | 0.28        | 0.22        | <b>0.54</b> | 0.13        | 0.10        | <b>0.48</b> | 0.33        | <b>0.63</b> | 0.08        | 0.41        | 0.39        | <b>0.62</b> | 0.40        | <b>0.57</b> | <b>As</b> |
| <b>Ba</b> | 0.29        | 0.09  | 0.21        | <b>0.56</b> |             | 0.39        | <b>0.59</b> | 0.18        | 0.24        | <b>0.72</b> | <b>0.70</b> | 0.28        | 0.48 | 0.32        | <b>0.52</b> | 0.33        | 0.42        | 0.43        | 0.07        | 0.40        | <b>0.61</b> | <b>0.65</b> | <b>0.64</b> | 0.36        | 0.05        | 0.29        | <b>0.54</b> | <b>0.68</b> | <b>Ba</b> |
| <b>Ca</b> | <b>0.66</b> | 0.31  | 0.27        | 0.41        | 0.39        |             | 0.31        | 0.06        | 0.42        | <b>0.47</b> | <b>0.47</b> | -0.06       | 0.26 | 0.30        | <b>0.80</b> | 0.24        | 0.26        | <b>0.54</b> | -0.33       | 0.10        | 0.41        | 0.43        | 0.25        | <b>0.96</b> | <b>0.64</b> | 0.37        | 0.16        | 0.36        | <b>Ca</b> |
| <b>Cd</b> | 0.30        | -0.11 | 0.14        | <b>0.55</b> | <b>0.59</b> | 0.31        |             | 0.24        | 0.23        | <b>0.68</b> | <b>0.59</b> | -0.02       | 0.20 | 0.40        | 0.21        | 0.13        | <b>0.48</b> | 0.13        | -0.02       | <b>0.55</b> | 0.31        | <b>0.75</b> | 0.22        | 0.33        | 0.15        | 0.19        | 0.18        | <b>0.74</b> | <b>Cd</b> |
| <b>Ce</b> | 0.02        | 0.04  | <b>0.68</b> | <b>0.46</b> | 0.18        | 0.06        | 0.24        |             | 0.38        | 0.24        | <b>0.47</b> | <b>0.51</b> | 0.48 | <b>0.85</b> | 0.10        | <b>0.47</b> | 0.42        | 0.14        | <b>0.67</b> | 0.30        | 0.41        | 0.04        | 0.14        | 0.07        | 0.12        | 0.42        | <b>0.54</b> | 0.10        | <b>Ce</b> |
| <b>Cr</b> | 0.34        | -0.09 | <b>0.69</b> | <b>0.65</b> | 0.24        | 0.42        | 0.23        | 0.38        |             | <b>0.47</b> | <b>0.65</b> | <b>0.44</b> | 0.10 | <b>0.50</b> | 0.36        | -0.01       | 0.39        | 0.11        | 0.14        | 0.28        | 0.24        | <b>0.44</b> | 0.04        | <b>0.44</b> | 0.38        | <b>0.77</b> | 0.35        | 0.38        | <b>Cr</b> |
| <b>Cu</b> | 0.38        | -0.04 | 0.38        | <b>0.62</b> | <b>0.72</b> | <b>0.47</b> | <b>0.68</b> | 0.24        | 0.47        |             | <b>0.78</b> | 0.29        | 0.34 | 0.39        | <b>0.48</b> | 0.22        | <b>0.57</b> | 0.32        | 0.13        | 0.37        | <b>0.56</b> | <b>0.73</b> | 0.37        | <b>0.46</b> | 0.19        | <b>0.57</b> | 0.38        | <b>0.76</b> | <b>Cu</b> |
| <b>Fe</b> | 0.36        | -0.02 | <b>0.60</b> | <b>0.85</b> | <b>0.70</b> | <b>0.47</b> | <b>0.59</b> | <b>0.47</b> | <b>0.65</b> | <b>0.78</b> |             | 0.36        | 0.40 | <b>0.60</b> | <b>0.49</b> | 0.36        | <b>0.65</b> | 0.30        | 0.25        | <b>0.54</b> | <b>0.58</b> | <b>0.72</b> | 0.33        | <b>0.48</b> | 0.34        | <b>0.70</b> | <b>0.54</b> | <b>0.66</b> | <b>Fe</b> |
| <b>Gd</b> | -0.21       | -0.05 | <b>0.44</b> | 0.19        | 0.28        | -0.06       | -0.02       | <b>0.51</b> | <b>0.44</b> | 0.29        | 0.36        |             | 0.24 | <b>0.50</b> | 0.16        | 0.20        | 0.21        | 0.08        | <b>0.66</b> | 0.10        | 0.33        | 0.12        | 0.27        | -0.08       | -0.10       | 0.44        | <b>0.60</b> | 0.28        | <b>Gd</b> |
| <b>K</b>  | 0.09        | 0.38  | 0.37        | 0.25        | <b>0.48</b> | 0.26        | 0.20        | <b>0.48</b> | 0.10        | 0.34        | 0.40        | 0.24        |      | <b>0.45</b> | <b>0.51</b> | <b>0.69</b> | 0.41        | <b>0.70</b> | 0.30        | 0.28        | <b>0.80</b> | 0.10        | <b>0.66</b> | 0.24        | 0.01        | 0.11        | <b>0.57</b> | 0.21        | <b>K</b>  |
| <b>La</b> | 0.16        | 0.11  | <b>0.62</b> | <b>0.53</b> | 0.32        | 0.30        | 0.40        | <b>0.85</b> | <b>0.50</b> | 0.39        | <b>0.60</b> | <b>0.50</b> | 0.45 |             | 0.32        | <b>0.44</b> | 0.35        | 0.30        | <b>0.56</b> | 0.31        | <b>0.46</b> | 0.29        | 0.20        | 0.31        | 0.25        | <b>0.50</b> | <b>0.62</b> | 0.29        | <b>La</b> |
| <b>Mg</b> | 0.39        | 0.26  | 0.26        | 0.28        | <b>0.52</b> | <b>0.80</b> | 0.21        | 0.10        | 0.36        | <b>0.48</b> | <b>0.49</b> | 0.16        | 0.51 | 0.32        |             | 0.38        | 0.26        | <b>0.82</b> | -0.07       | 0.21        | <b>0.64</b> | <b>0.45</b> | <b>0.60</b> | <b>0.78</b> | 0.39        | 0.30        | <b>0.43</b> | 0.42        | <b>Mg</b> |
| <b>Mn</b> | 0.12        | 0.15  | 0.31        | 0.22        | 0.33        | 0.24        | 0.13        | <b>0.47</b> | -0.01       | 0.22        | 0.36        | 0.20        | 0.69 | <b>0.44</b> | 0.38        |             | 0.44        | <b>0.47</b> | 0.26        | 0.23        | <b>0.71</b> | -0.07       | <b>0.47</b> | 0.23        | 0.11        | 0.12        | 0.41        | -0.01       | <b>Mn</b> |
| <b>Mo</b> | 0.23        | -0.09 | 0.50        | <b>0.54</b> | 0.42        | 0.26        | <b>0.48</b> | 0.42        | 0.39        | <b>0.57</b> | <b>0.65</b> | 0.21        | 0.41 | 0.35        | 0.26        | 0.44        |             | 0.15        | 0.15        | 0.34        | <b>0.57</b> | 0.29        | 0.34        | 0.29        | 0.14        | <b>0.45</b> | 0.24        | 0.37        | <b>Mo</b> |
| <b>Na</b> | 0.20        | 0.39  | 0.19        | 0.13        | 0.43        | <b>0.54</b> | 0.13        | 0.14        | 0.11        | 0.32        | 0.30        | 0.08        | 0.70 | 0.30        | <b>0.82</b> | <b>0.47</b> | 0.15        |             | 0.04        | 0.20        | <b>0.65</b> | 0.23        | <b>0.61</b> | <b>0.52</b> | 0.14        | 0.09        | <b>0.45</b> | 0.24        | <b>Na</b> |
| <b>Nd</b> | -0.42       | -0.04 | 0.30        | 0.10        | 0.07        | -0.33       | -0.02       | <b>0.67</b> | 0.14        | 0.13        | 0.25        | <b>0.66</b> | 0.30 | <b>0.56</b> | -0.07       | 0.26        | 0.15        | 0.04        |             | 0.17        | 0.28        | -0.02       | 0.18        | -0.34       | -0.21       | 0.24        | <b>0.60</b> | 0.10        | <b>Nd</b> |
| <b>Ni</b> | 0.09        | -0.34 | 0.19        | <b>0.48</b> | 0.40        | 0.10        | <b>0.55</b> | 0.30        | 0.28        | 0.37        | <b>0.54</b> | 0.10        | 0.28 | 0.31        | 0.21        | 0.23        | 0.34        | 0.20        | 0.17        |             | 0.34        | <b>0.49</b> | 0.17        | 0.14        | 0.04        | 0.20        | 0.29        | <b>0.47</b> | <b>Ni</b> |
| <b>P</b>  | 0.21        | 0.23  | 0.38        | 0.33        | <b>0.61</b> | 0.41        | 0.31        | 0.41        | 0.24        | <b>0.56</b> | <b>0.58</b> | 0.33        | 0.80 | <b>0.46</b> | <b>0.64</b> | <b>0.71</b> | <b>0.57</b> | <b>0.65</b> | 0.28        | 0.34        |             | 0.26        | <b>0.74</b> | 0.39        | 0.13        | 0.29        | <b>0.60</b> | 0.35        | <b>P</b>  |
| <b>Pb</b> | 0.29        | -0.11 | 0.16        | <b>0.63</b> | <b>0.65</b> | 0.43        | <b>0.75</b> | 0.04        | <b>0.44</b> | <b>0.73</b> | <b>0.72</b> | 0.12        | 0.10 | 0.29        | <b>0.45</b> | -0.07       | 0.29        | 0.23        | -0.02       | <b>0.49</b> | 0.26        |             | 0.18        | 0.44        | 0.18        | 0.38        | 0.31        | <b>0.84</b> | <b>Pb</b> |
| <b>S</b>  | 0.08        | 0.20  | 0.08        | 0.08        | <b>0.64</b> | 0.25        | 0.22        | 0.14        | 0.04        | 0.37        | 0.33        | 0.27        | 0.66 | 0.20        | <b>0.60</b> | <b>0.47</b> | 0.34        | <b>0.61</b> | 0.18        | 0.17        | <b>0.74</b> | 0.18        |             | 0.21        | -0.11       | -0.01       | <b>0.49</b> | 0.26        | <b>S</b>  |
| <b>Sr</b> | <b>0.66</b> | 0.25  | 0.29        | 0.41        | 0.36        | <b>0.96</b> | 0.33        | 0.07        | <b>0.44</b> | <b>0.46</b> | 0.48        | -0.08       | 0.24 | 0.31        | <b>0.78</b> | 0.23        | 0.29        | <b>0.52</b> | -0.34       | 0.14        | 0.39        | 0.44        | 0.21        |             | <b>0.61</b> | 0.41        | 0.13        | 0.35        | <b>Sr</b> |
| <b>Th</b> | <b>0.63</b> | 0.16  | 0.31        | 0.39        | 0.05        | <b>0.64</b> | 0.15        | 0.12        | 0.38        | 0.19        | 0.34        | -0.10       | 0.01 | 0.25        | 0.39        | 0.11        | 0.14        | 0.14        | -0.21       | 0.04        | 0.13        | 0.18        | -0.11       | <b>0.61</b> |             | 0.42        | -0.01       | 0.01        | <b>Th</b> |
| <b>V</b>  | 0.34        | -0.05 | <b>0.75</b> | <b>0.62</b> | 0.29        | 0.37        | 0.19        | 0.42        | <b>0.77</b> | <b>0.57</b> | <b>0.70</b> | 0.44        | 0.11 | <b>0.50</b> | 0.30        | 0.12        | 0.45        | 0.09        | 0.24        | 0.20        | 0.29        | 0.38        | -0.01       | 0.41        | 0.42        |             | 0.30        | 0.35        | <b>V</b>  |
| <b>Y</b>  | -0.13       | 0.08  | 0.39        | 0.40        | <b>0.54</b> | 0.16        | 0.18        | <b>0.54</b> | 0.35        | 0.38        | <b>0.54</b> | <b>0.60</b> | 0.57 | <b>0.62</b> | 0.43        | 0.41        | 0.24        | <b>0.45</b> | <b>0.60</b> | 0.29        | <b>0.60</b> | 0.31        | <b>0.49</b> | 0.13        | -0.01       | 0.30        |             | 0.39        | <b>Y</b>  |
| <b>Zn</b> | 0.07        | -0.10 | 0.13        | <b>0.57</b> | <b>0.68</b> | 0.36        | <b>0.74</b> | 0.10        | 0.38        | <b>0.76</b> | <b>0.66</b> | 0.28        | 0.21 | 0.29        | 0.42        | -0.01       | 0.37        | 0.24        | 0.10        | <b>0.47</b> | 0.35        | <b>0.84</b> | 0.26        | 0.35        | 0.01        | 0.35        | 0.39        |             | <b>Zn</b> |
|           | pH          | EC    | Al          | As          | Ba          | Ca          | Cd          | Ce          | Cr          | Cu          | Fe          | Gd          | K    | La          | Mg          | Mn          | Mo          | Na          | Nd          | Ni          | P           | Pb          | S           | Sr          | Th          | V           | Y           | Zn          |           |

**Table S2.** Component Loadings for PC1-PC8.

|           | PC1    | PC2    | PC3    | PC4    | PC5    | PC6    | PC7    | PC8    |
|-----------|--------|--------|--------|--------|--------|--------|--------|--------|
| <b>Al</b> | 0.119  | -0.109 | -0.037 | -0.256 | -0.535 | 0.227  | 0.023  | 0.547  |
| <b>As</b> | 0.190  | -0.256 | 0.016  | -0.184 | 0.201  | 0.164  | -0.402 | -0.166 |
| <b>Ba</b> | -0.183 | -0.062 | -0.289 | 0.085  | -0.032 | 0.459  | -0.212 | 0.041  |
| <b>Ca</b> | -0.231 | -0.125 | 0.368  | -0.157 | -0.035 | 0.069  | 0.083  | -0.030 |
| <b>Ce</b> | 0.343  | 0.078  | 0.052  | -0.129 | -0.152 | -0.043 | 0.002  | -0.150 |
| <b>Cr</b> | 0.252  | -0.160 | 0.223  | 0.166  | 0.264  | 0.001  | -0.114 | 0.180  |
| <b>Cu</b> | -0.103 | -0.284 | -0.263 | -0.057 | -0.165 | 0.122  | 0.276  | 0.085  |
| <b>Fe</b> | 0.227  | -0.279 | -0.069 | -0.105 | 0.196  | 0.082  | -0.184 | 0.020  |
| <b>Gd</b> | 0.267  | 0.052  | 0.044  | 0.390  | -0.016 | -0.031 | 0.300  | 0.166  |
| <b>K</b>  | 0.040  | 0.330  | -0.119 | -0.106 | -0.063 | 0.254  | -0.353 | -0.164 |
| <b>La</b> | 0.293  | 0.048  | 0.222  | 0.049  | -0.205 | 0.027  | 0.044  | -0.295 |
| <b>Mg</b> | -0.297 | 0.125  | 0.264  | 0.105  | 0.121  | 0.025  | 0.019  | 0.115  |
| <b>Mn</b> | 0.078  | 0.288  | 0.004  | -0.376 | -0.102 | 0.089  | 0.080  | -0.243 |
| <b>Mo</b> | 0.178  | 0.024  | -0.168 | -0.322 | 0.461  | 0.090  | 0.271  | 0.168  |
| <b>Na</b> | -0.171 | 0.279  | 0.186  | 0.095  | 0.099  | 0.001  | -0.268 | 0.115  |
| <b>Nd</b> | 0.273  | 0.149  | -0.189 | 0.166  | -0.091 | -0.164 | 0.183  | -0.178 |
| <b>Ni</b> | 0.003  | -0.003 | -0.181 | -0.162 | -0.139 | -0.697 | -0.390 | 0.293  |
| <b>P</b>  | -0.027 | 0.299  | -0.231 | -0.154 | 0.176  | 0.093  | 0.169  | 0.206  |
| <b>Pb</b> | -0.176 | -0.316 | -0.159 | 0.152  | -0.032 | -0.023 | -0.107 | -0.132 |
| <b>S</b>  | -0.126 | 0.313  | -0.215 | 0.162  | 0.237  | -0.004 | -0.022 | 0.165  |
| <b>Sr</b> | -0.239 | -0.079 | 0.380  | -0.132 | -0.037 | 0.011  | 0.130  | 0.051  |
| <b>V</b>  | 0.290  | -0.144 | 0.164  | 0.103  | 0.209  | 0.101  | -0.047 | 0.265  |
| <b>Y</b>  | 0.136  | 0.163  | 0.029  | 0.416  | -0.240 | 0.251  | -0.202 | 0.153  |
| <b>Zn</b> | -0.154 | -0.241 | -0.300 | 0.227  | 0.010  | -0.058 | 0.094  | -0.226 |

**Table S3.** Summary of Principal Components.

|                                      | PC1   | PC2   | PC3   | PC4   | PC5   | PC6   | PC7   | PC8   | PC9   | PC10  | PC11  |
|--------------------------------------|-------|-------|-------|-------|-------|-------|-------|-------|-------|-------|-------|
| Standard deviation                   | 2.531 | 2.305 | 1.897 | 1.362 | 1.155 | 1.087 | 0.946 | 0.832 | 0.701 | 0.622 | 0.568 |
| Proportion of Variance               | 0.267 | 0.221 | 0.150 | 0.077 | 0.056 | 0.049 | 0.037 | 0.029 | 0.020 | 0.016 | 0.013 |
| Cumulative Proportion                | 0.267 | 0.488 | 0.638 | 0.716 | 0.771 | 0.821 | 0.858 | 0.887 | 0.907 | 0.923 | 0.937 |
|                                      |       |       |       |       |       |       |       |       |       |       |       |
|                                      | PC12  | PC13  | PC14  | PC15  | PC16  | PC17  | PC18  | PC19  | PC20  | PC21  | PC22  |
| Standard deviation                   | 0.524 | 0.501 | 0.477 | 0.439 | 0.346 | 0.345 | 0.315 | 0.294 | 0.255 | 0.213 | 0.181 |
| Proportion of Variance               | 0.011 | 0.010 | 0.009 | 0.008 | 0.005 | 0.005 | 0.004 | 0.004 | 0.003 | 0.002 | 0.001 |
| Cumulative Proportion                | 0.948 | 0.959 | 0.968 | 0.976 | 0.981 | 0.986 | 0.990 | 0.994 | 0.996 | 0.998 | 1.000 |
|                                      |       |       |       |       |       |       |       |       |       |       |       |
|                                      | PC23  | PC24  |       |       |       |       |       |       |       |       |       |
| Standard deviation                   | 0.092 | 0.000 |       |       |       |       |       |       |       |       |       |
| Proportion of Variance               | 0.000 | 0.000 |       |       |       |       |       |       |       |       |       |
| Cumulative Proportion                | 1.000 | 1.000 |       |       |       |       |       |       |       |       |       |
| Number of observations included = 51 |       |       |       |       |       |       |       |       |       |       |       |

**Table S4.** Eigenvalues (variances) for the first 8 components.

| PC1   | PC2   | PC3   | PC4   | PC5   | PC6   | PC7   | PC8   |
|-------|-------|-------|-------|-------|-------|-------|-------|
| 6.407 | 5.313 | 3.600 | 1.856 | 1.335 | 1.182 | 0.894 | 0.692 |
